# Supplementary material
Source: HighWire-hosted journal article supplement (https://www.cmaj.ca/highwire/filestream/59786/field_highwire_adjunct_files/0/150778-image-1-at.pdf)
Supplement: 150778-image-1-at.pdf [file 150778-image-1-at.pdf]

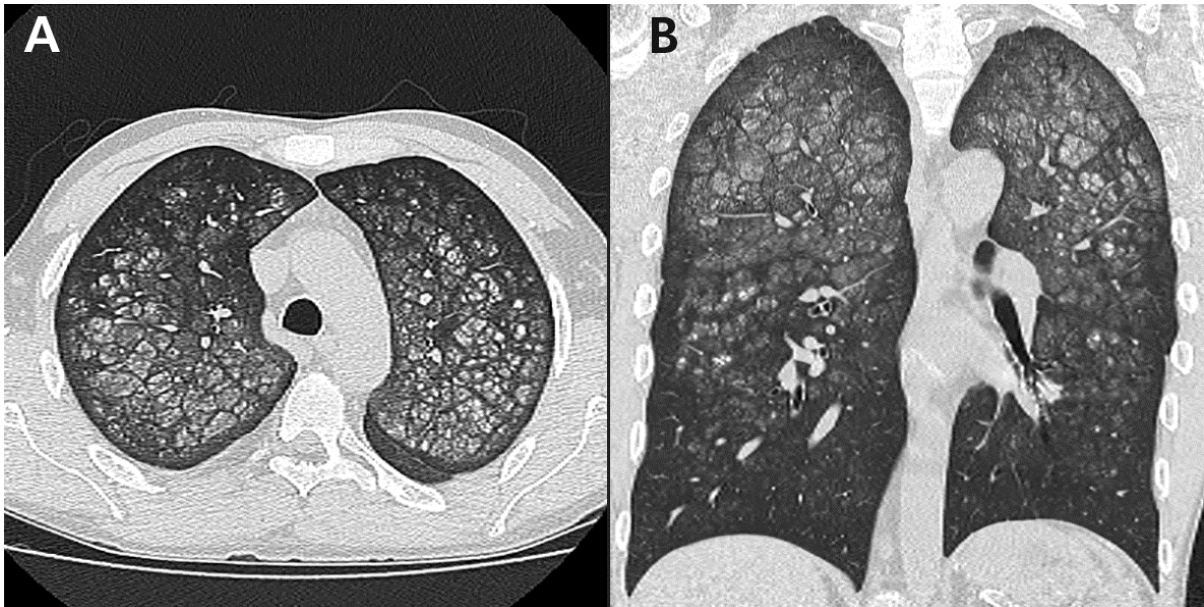

**Appendix 1: Computed tomography scans.** (A) Thoracic view, showing extensive ground glass opacities in an acinar distribution, with areas of calcification and sub-pleural sparing. (B) Coronal view, illustrating the upper-zone predominance of the ground glass opacities.
